# Supplementary material for: Hypothermic Protection in Neocortex is Topographic and Laminar, Seizure Unmitigating, and Partially Rescues Neurons Depleted of RNA Splicing Protein RBFOX3 in Neonatal Hypoxic-Ischemic Piglets
Source: Preprints.org preprint supplement (doi:10.20944/preprints202307.0276.v1), 2023-07-05

# Hypothermic Protection in Neocortex is Topographic and Laminar, Seizure Unmitigating, and Partially Rescues Neurons Depleted of RNA Splicing Protein RBFOX3 in Neonatal Hypoxic-Ischemic Piglets

Christopher T. Primiani<sup>1</sup>, Jennifer K. Lee<sup>2</sup>, Caitlin E. O'Brien<sup>2</sup>, May W. Chen<sup>3</sup>, Jamie Perin<sup>4</sup>, Ewa Kulikowicz<sup>2</sup>, Polan Santos<sup>2</sup>, Shawn Adams,<sup>2</sup> Bailey Lester<sup>2</sup>, Natalia Rivera-Diaz<sup>2</sup>, Valerie Olberding<sup>2</sup>, Mark V. Niedzwiecki<sup>2</sup>, Eva K. Ritzl<sup>1</sup>, Christa W. Habela<sup>1</sup>, Xiuyun Liu<sup>2</sup>, Zeng-Jin Yang<sup>2</sup>, Raymond C. Koehler<sup>2</sup>, and Lee J. Martin<sup>5,6,7\*</sup>

## Supplementary Materials:

### Animal attrition

Forty piglets were anesthetized for intubation and catheter placement. Among piglets randomized to HI and normothermia, one animal died of refractory hypotension during anesthesia and a second piglet could not be extubated. One HI hypothermia piglet had a pulmonary hemorrhage, and another had a cardiac arrest, excluding them from the study. One sham hypothermia piglet could not be intubated and a second did not sustain adequate ventilation upon extubation and thus did not complete the protocol. Three HI-hypothermia, 1 HI-normothermia, and 1 sham-hypothermia piglet received dopamine during anesthesia. Hypoxia-ischemia, HI. Whiskers show the 5-95<sup>th</sup> percentiles.

### Anesthesia toxicity

To examine the potential effects of the anesthetic regimen with and without hypothermia, we compared the ratio of normal-to-total neurons among naïve unanesthetized (n=6), sham normothermic (n=6), and sham hypothermic (n=10) piglets. The ratio of normal neurons did not differ between anterior and mid-parietal somatosensory and motor cortices among the unanesthetized and sham procedure piglets ( $p>0.05$  for all comparisons).

## Supplementary Figure 1

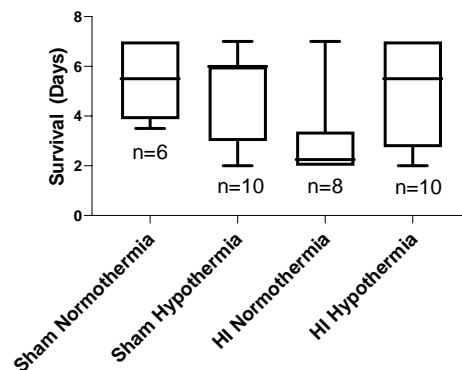

**Supplementary Figure 1.** The duration of survival did not differ among groups ( $p=0.078$ ).

**Supplementary Figure 2.** HT protects the putamen from HI injury

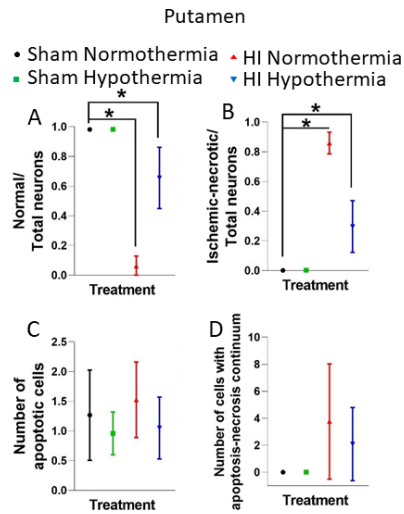

**Supplementary Figure 2.** HT reduced the burden of HI neuronal injury in putamen after adjusting for survival duration. **A.** Loss of normal neurons occurred in HI-HT piglets ( $p=0.008$ ) and HI-NT ( $p<0.001$ ) compared to sham-NT piglets. **B.** More ischemic necrosis occurred in HI-HT ( $p=0.014$ ) and HI-NT ( $p<0.001$ ) piglets compared sham-NT piglets. **C, D.** The number of cells with apoptosis or the apoptosis-necrosis continuum did not differ among groups. Data are shown with means and 95% CIs. \* $p<0.05$ . Hypoxia-ischemia, HI.

Full Length NeuN western blot

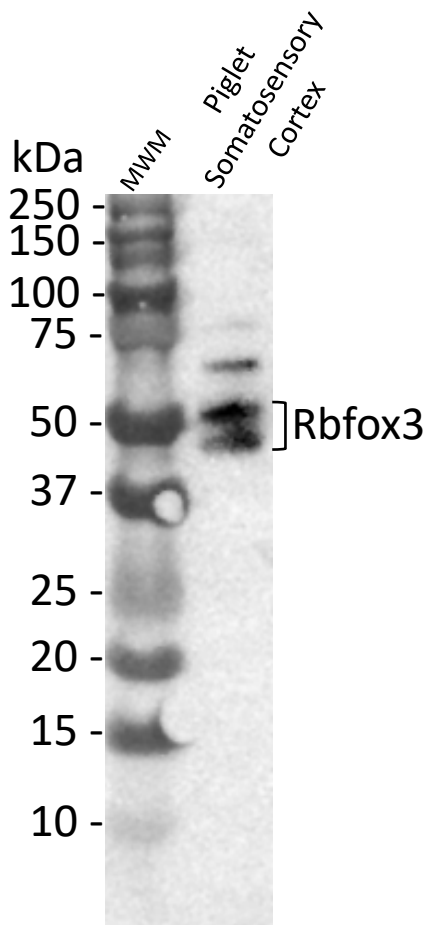

Supplement: Supplementary file 1 [file supplementary]
